# Supplementary material for: Conjugated microporous polymers using a copper-catalyzed [4 + 2] cyclobenzannulation reaction: promising materials for iodine and dye adsorption
Source: Royal Society of Chemistry journal article supplement (doi:10.1039/d1py00193k), 2021-01-01
Supplement: d1py00193k1.pdf [file d1py00193k1.pdf]

Supplementary Information

## Conjugated Microporous Polymers Using a Copper-Catalyzed [4+2] Cyclobenzannulation Reaction: Promising Materials for Iodine and Dye Adsorption

Noorullah Baig<sup>a,b</sup>, Suchetha Shetty<sup>a,b</sup>, Saleh Al-Mousawi<sup>c</sup>, Bassam Alameddine<sup>\*a,b</sup>

<sup>a</sup> Department of Mathematics and Natural Sciences, Gulf University for Science and Technology, Kuwait.

<sup>b</sup> Functional Materials Group – CAMB, GUST, Kuwait.

<sup>c</sup> Department of Chemistry, University of Kuwait, Kuwait.

Tel: +965 2530 7476.

*E-mail address:* [alameddine.b@gust.edu.kw](mailto:alameddine.b@gust.edu.kw)

### Contents

|                                                                                        |                |
|----------------------------------------------------------------------------------------|----------------|
| <sup>1</sup> H NMR spectrum of <b>1</b> , <b>CBM1-2</b> , <b>2d</b> , and <b>CBP1</b>  | Figure S1-S5   |
| <sup>13</sup> C NMR spectrum of <b>1</b> , <b>CBM1-2</b> , <b>2d</b> , and <b>CBP1</b> | Figure S6-S10  |
| EI-HRMS of <b>1</b> , <b>CBM1-2</b> , and <b>2d</b>                                    | Figure S11-S14 |
| Comparative FT-IR spectra of <b>CBP2-5</b>                                             | Figure S15     |
| GPC Chromatogram of <b>CBP1</b> , <b>CBP3</b>                                          | Figure S16-17  |
| UV-VIS absorption and emission spectra of <b>CBP4-5</b>                                | Figure S18     |
| Adsorption of Methylene blue (MB) by <b>CBP1-4</b>                                     | Figure S19-S22 |

---

\*†Corresponding author. *E-mail address:* [alameddine.b@gust.edu.kw](mailto:alameddine.b@gust.edu.kw)

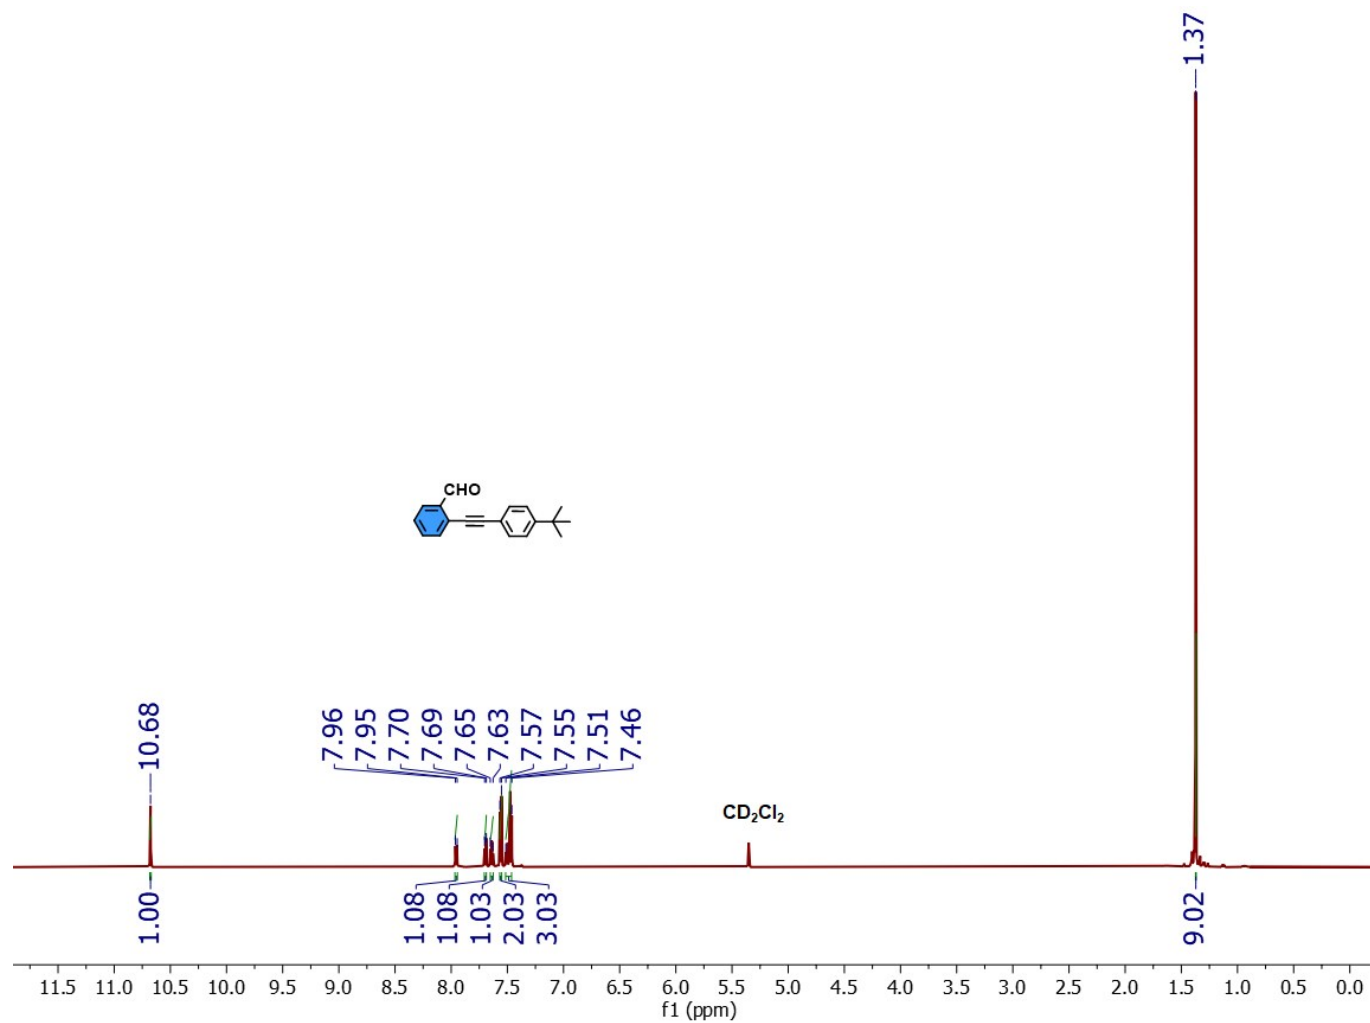

**Figure S1:** <sup>1</sup>H NMR spectrum of **1** (CD<sub>2</sub>Cl<sub>2</sub>, 600 MHz)

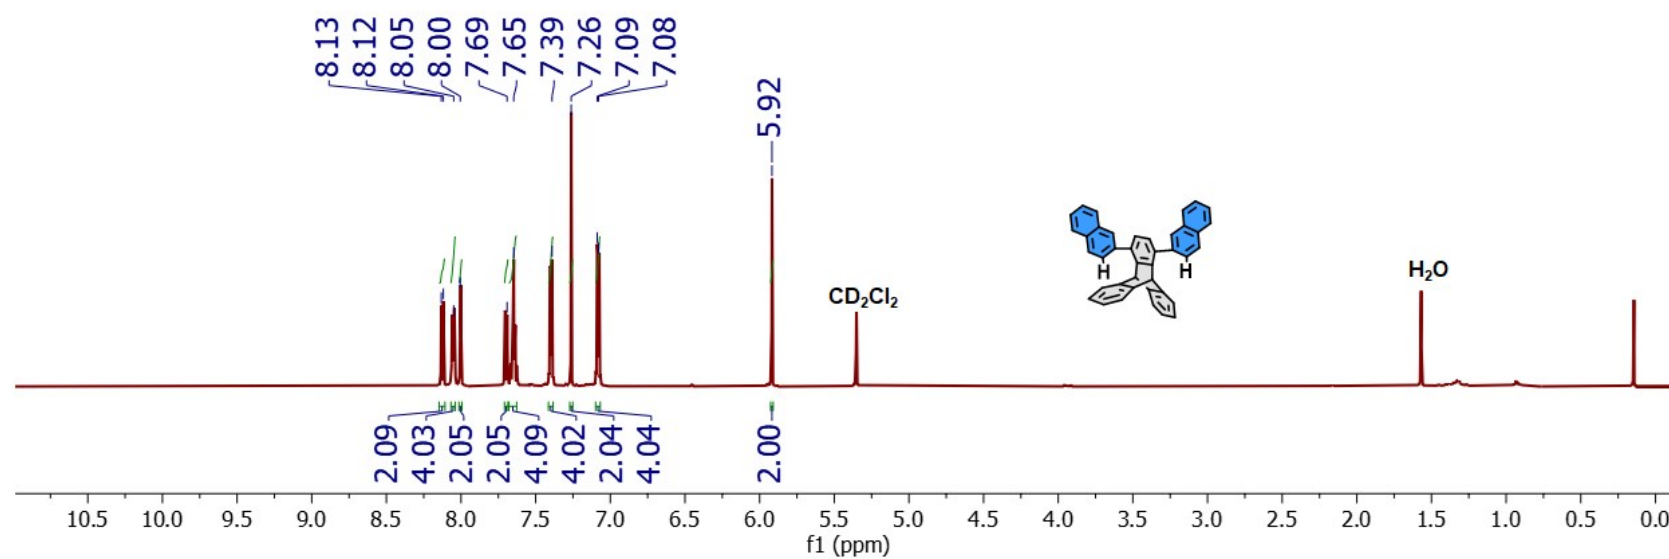

**Figure S2:** <sup>1</sup>H NMR spectrum of **CBM1** (CD<sub>2</sub>Cl<sub>2</sub>, 600 MHz)

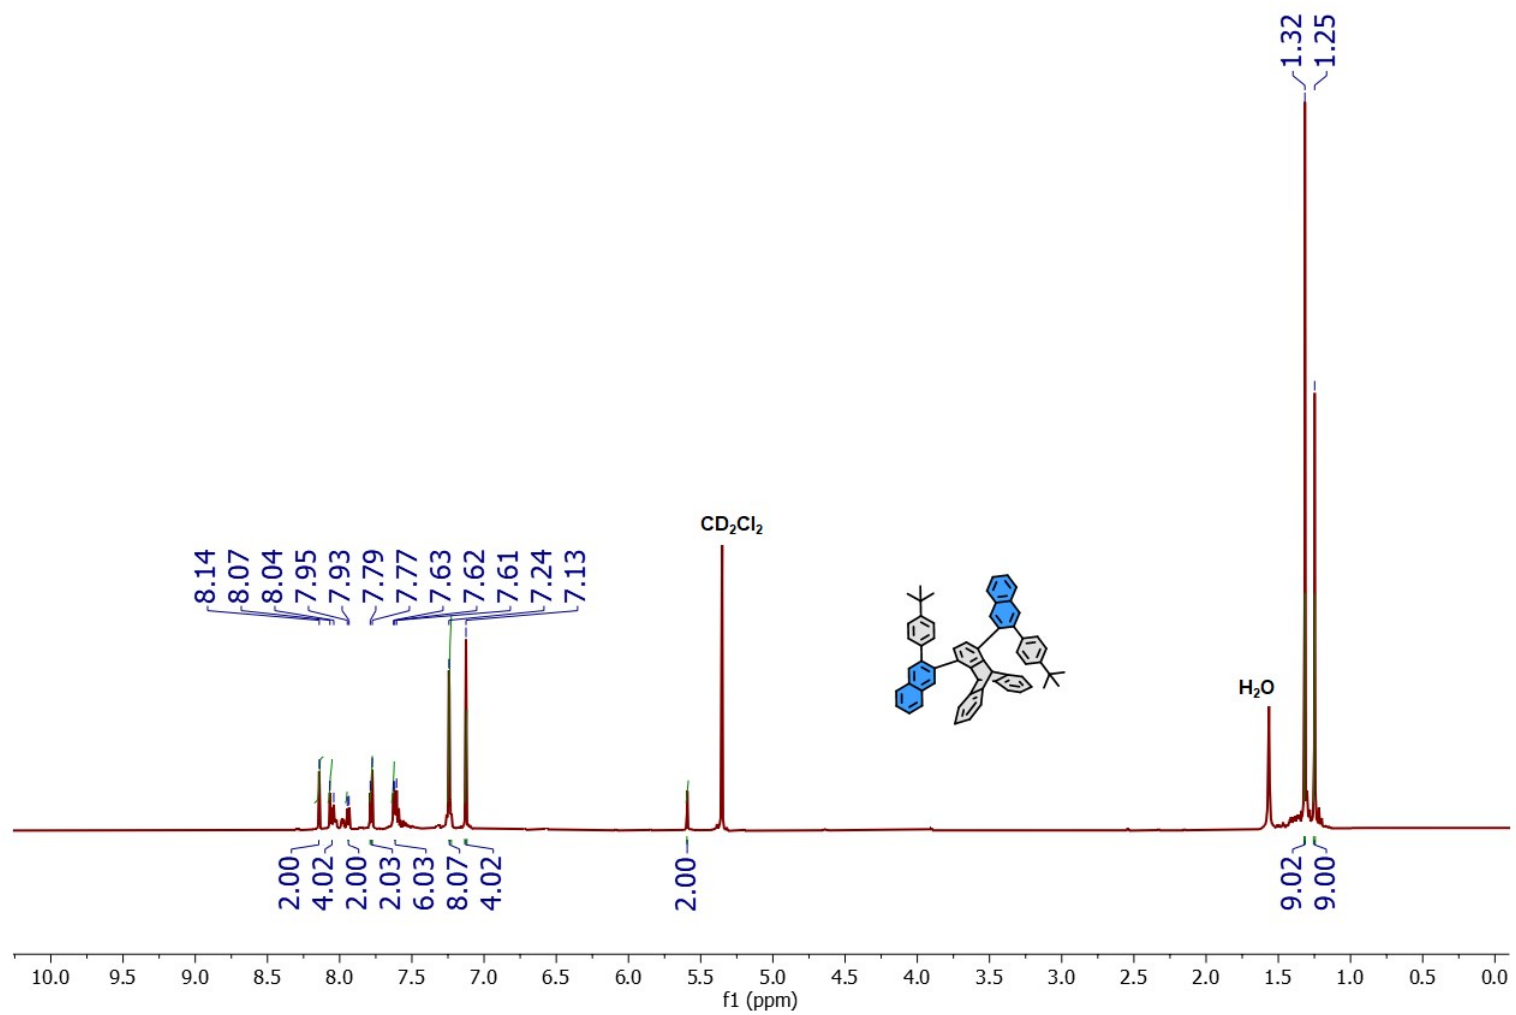

**Figure S3:** <sup>1</sup>H NMR spectrum of **CBM2** (CD<sub>2</sub>Cl<sub>2</sub>, 600 MHz)

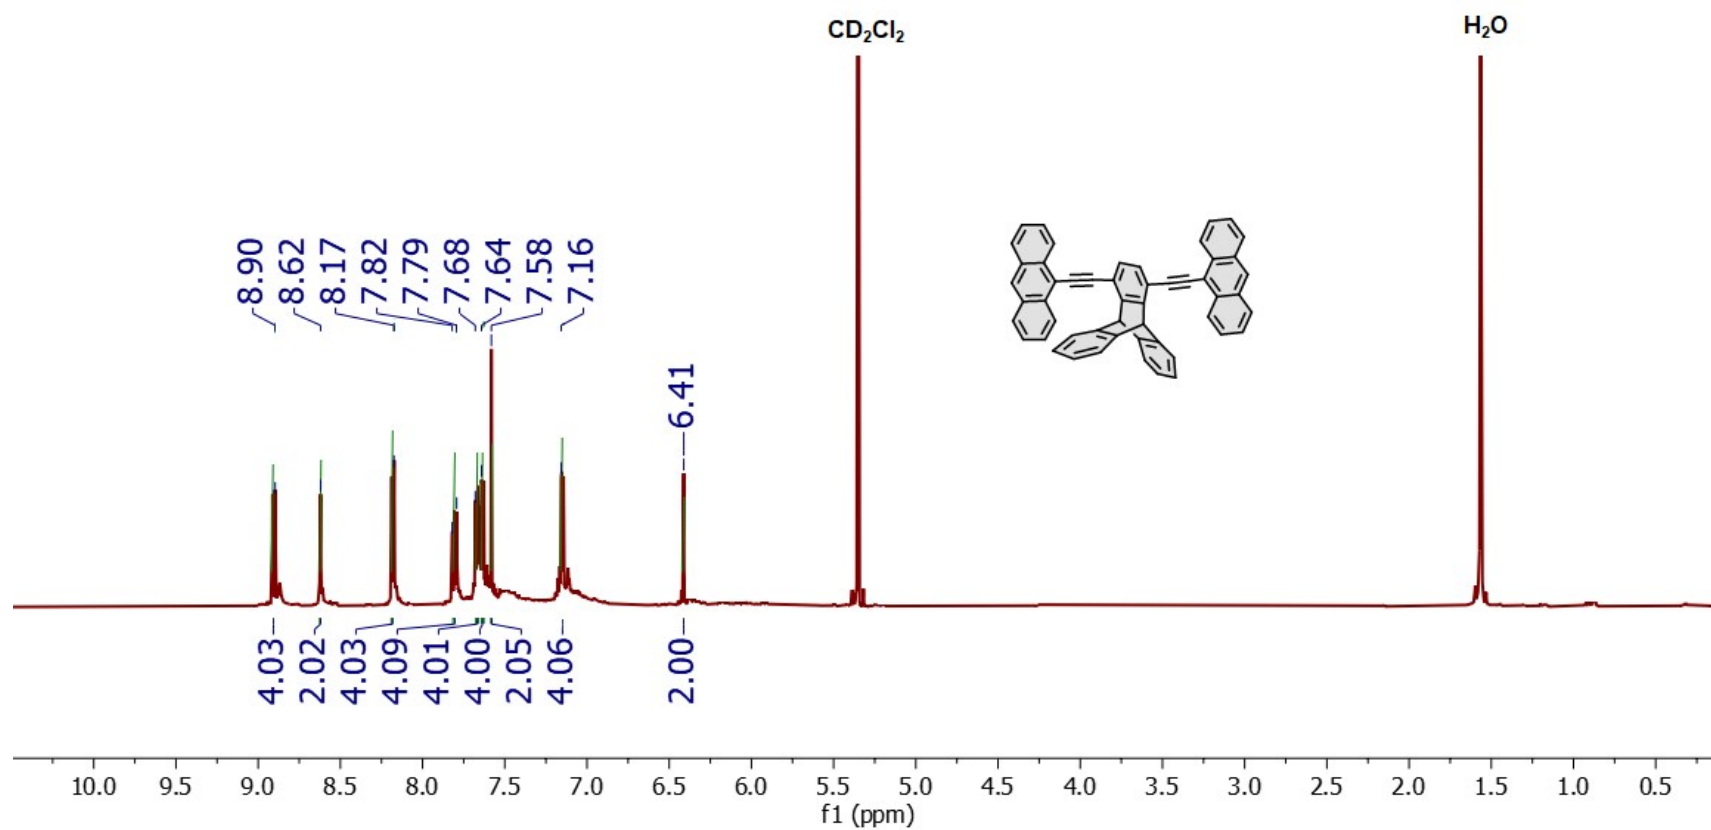

**Figure S4:** <sup>1</sup>H NMR spectrum of **2d** (CD<sub>2</sub>Cl<sub>2</sub>, 600 MHz)

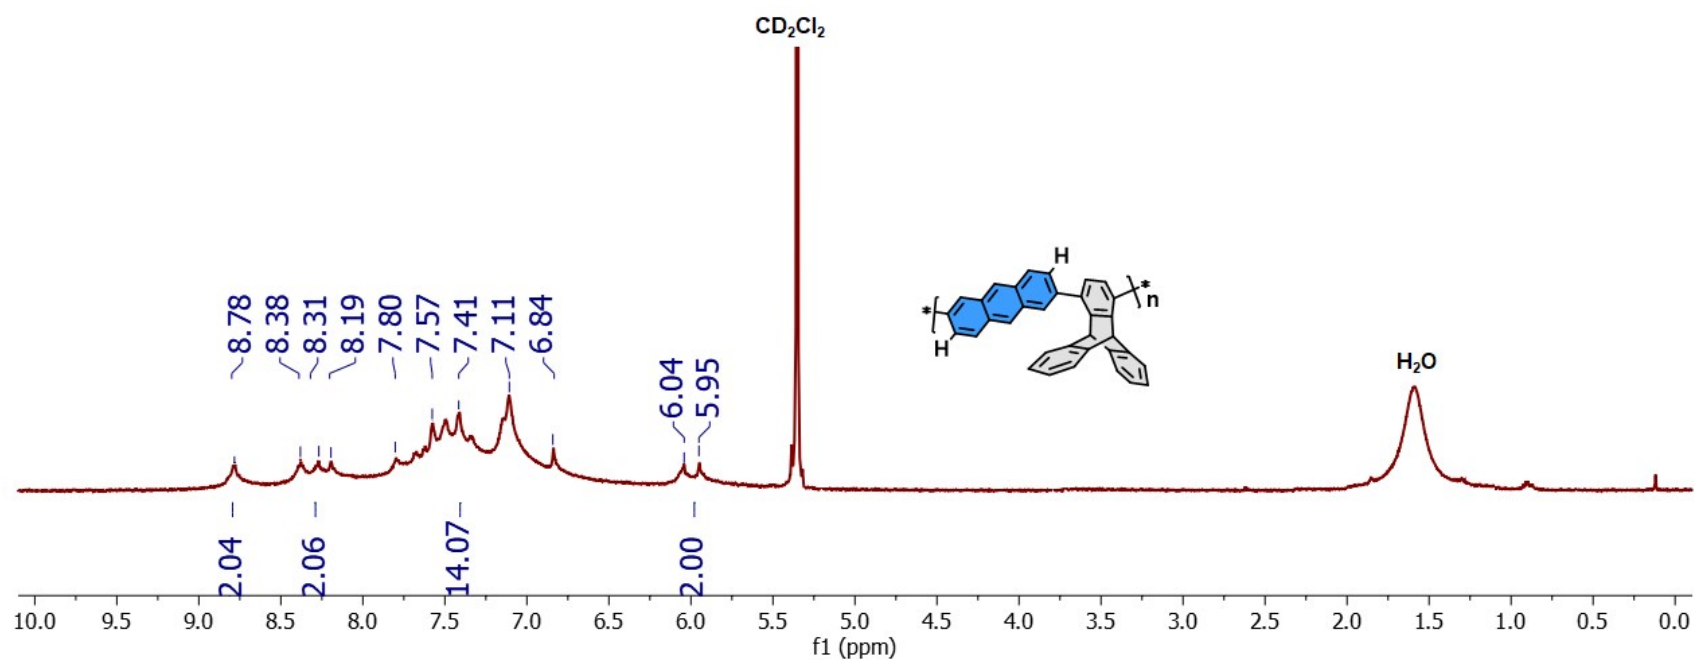

**Figure S5:**  $^1\text{H}$  NMR spectrum of **CBP1** ( $\text{CD}_2\text{Cl}_2$ , 600 MHz)

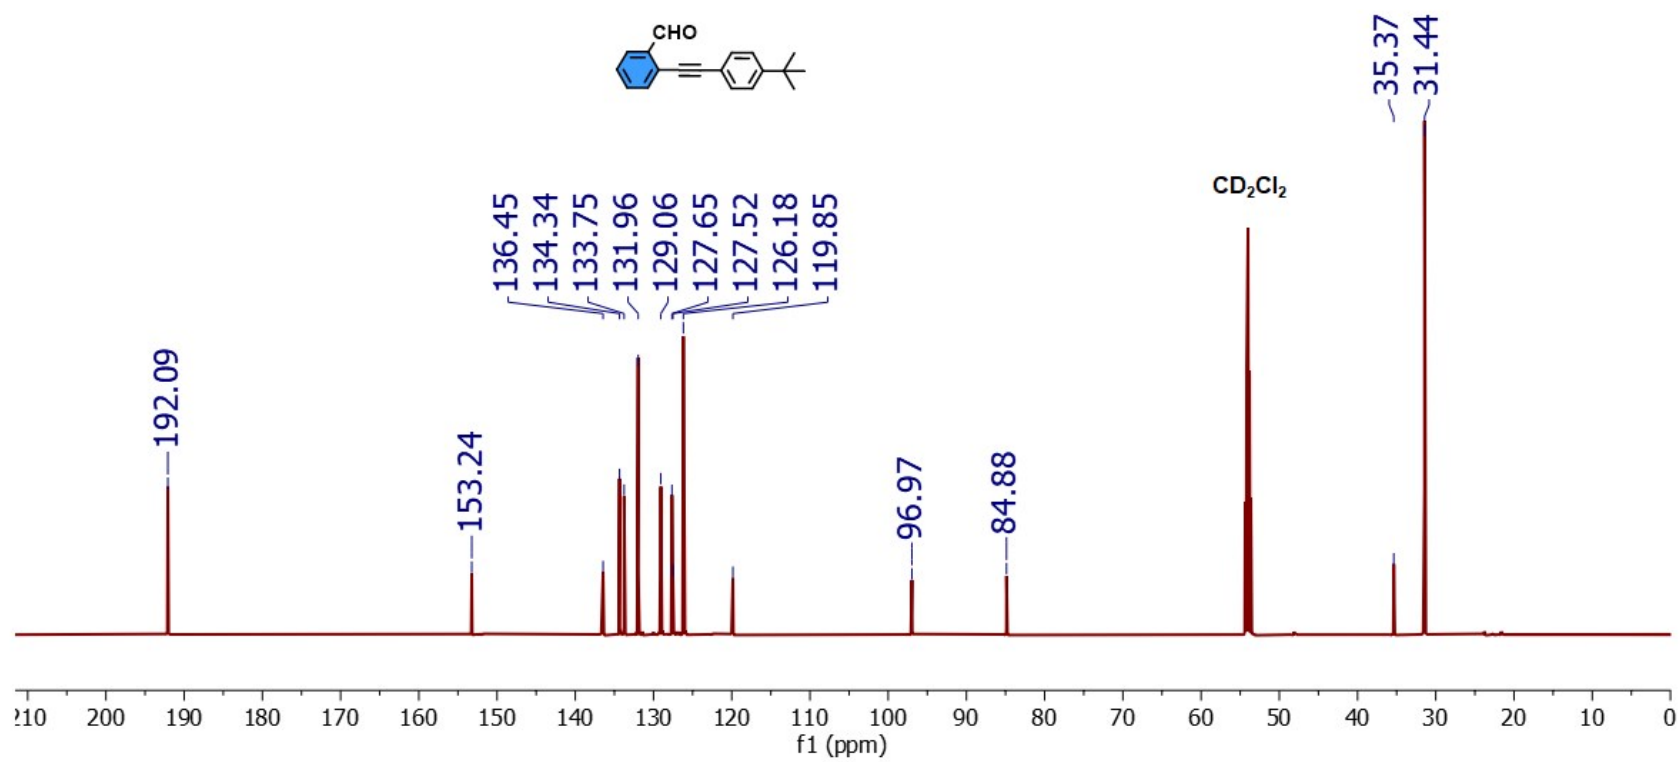

**Figure S6:** <sup>13</sup>C NMR spectrum of **1** (CD<sub>2</sub>Cl<sub>2</sub>, 150 MHz)

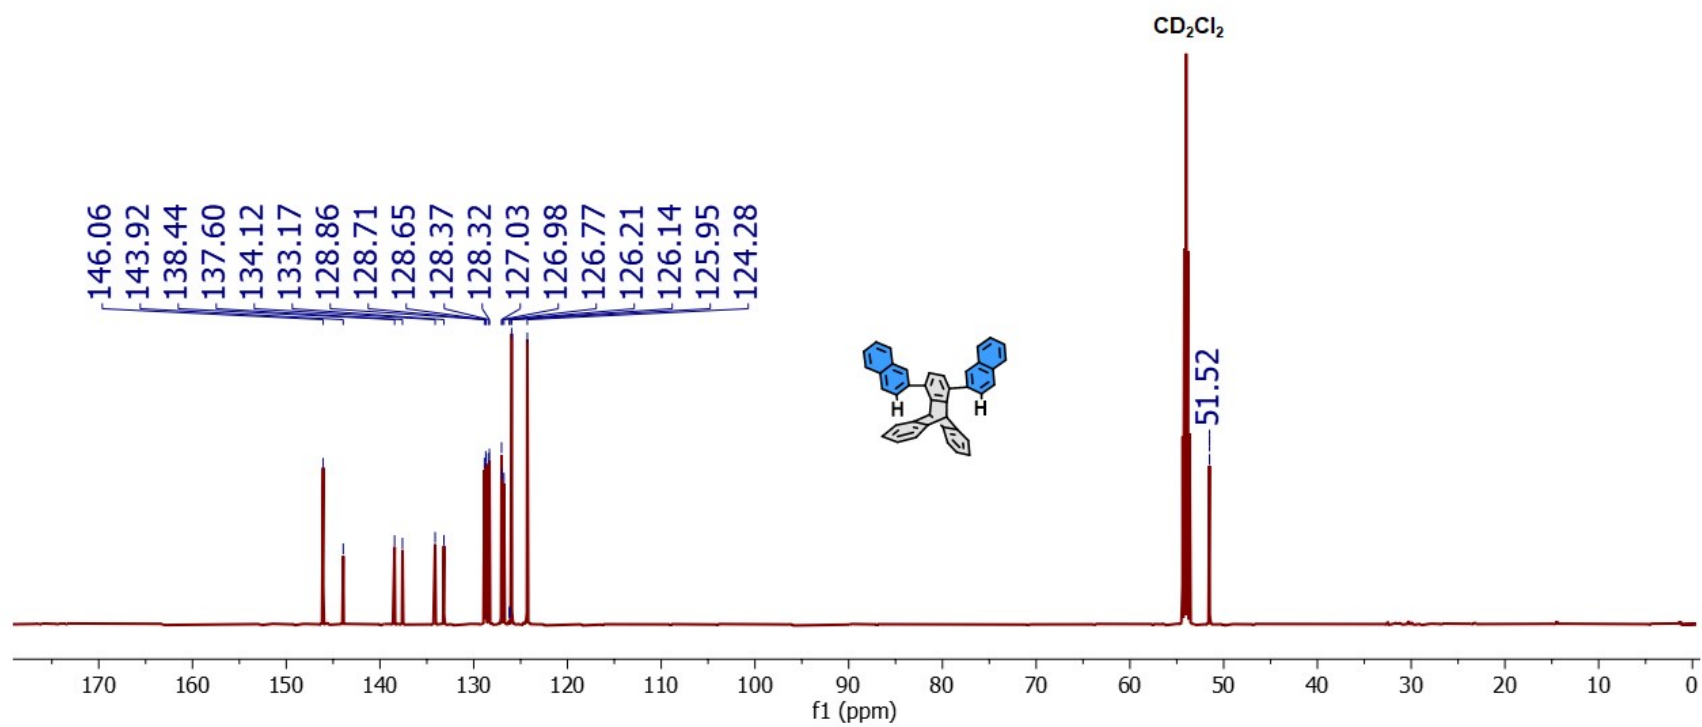

**Figure S7:**  $^{13}\text{C}$  NMR spectrum of **CBM1** ( $\text{CD}_2\text{Cl}_2$ , 150 MHz)



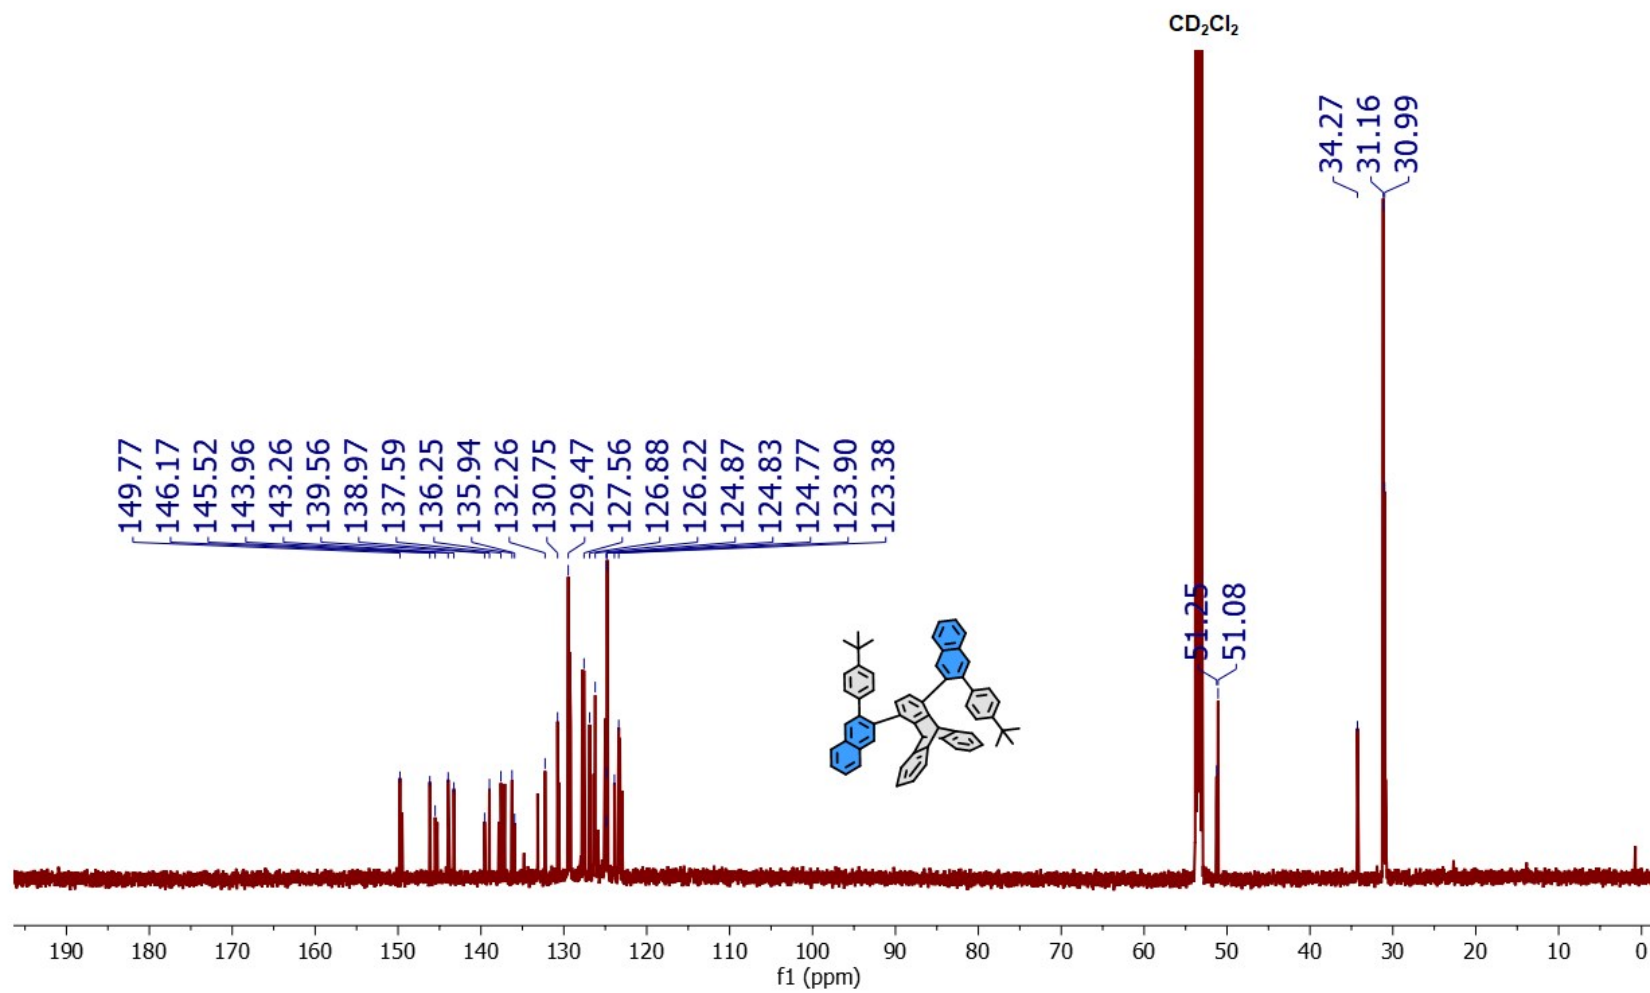

**Figure S8:** <sup>13</sup>C NMR spectrum of **CBM2** (CD<sub>2</sub>Cl<sub>2</sub>, 150 MHz)

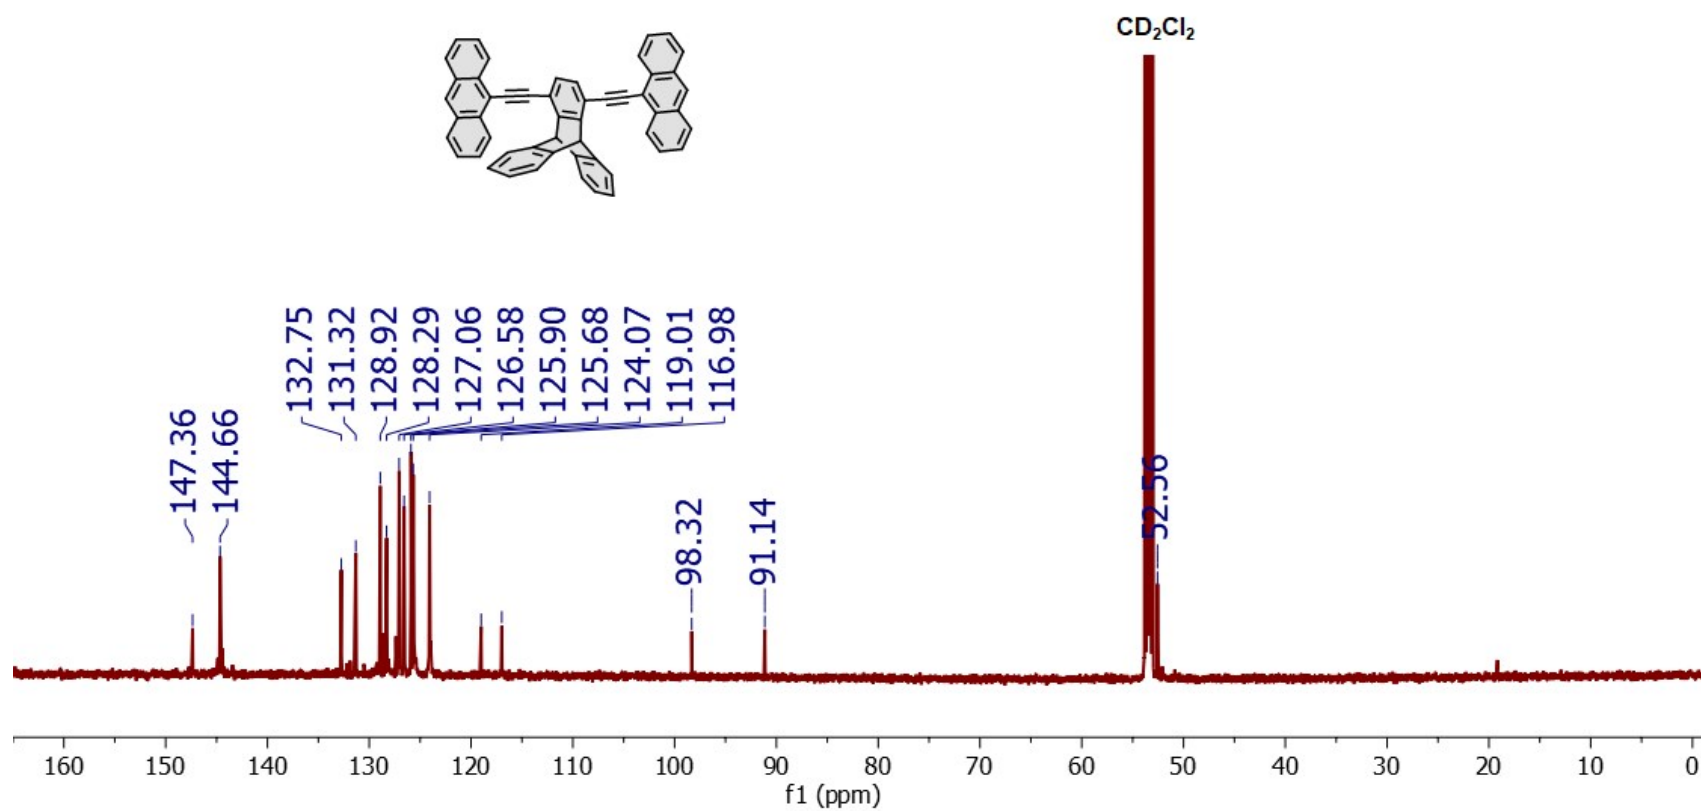

**Figure S9:**  $^{13}\text{C}$  NMR spectrum of **2d** (CD $_2$ Cl $_2$ , 150 MHz)

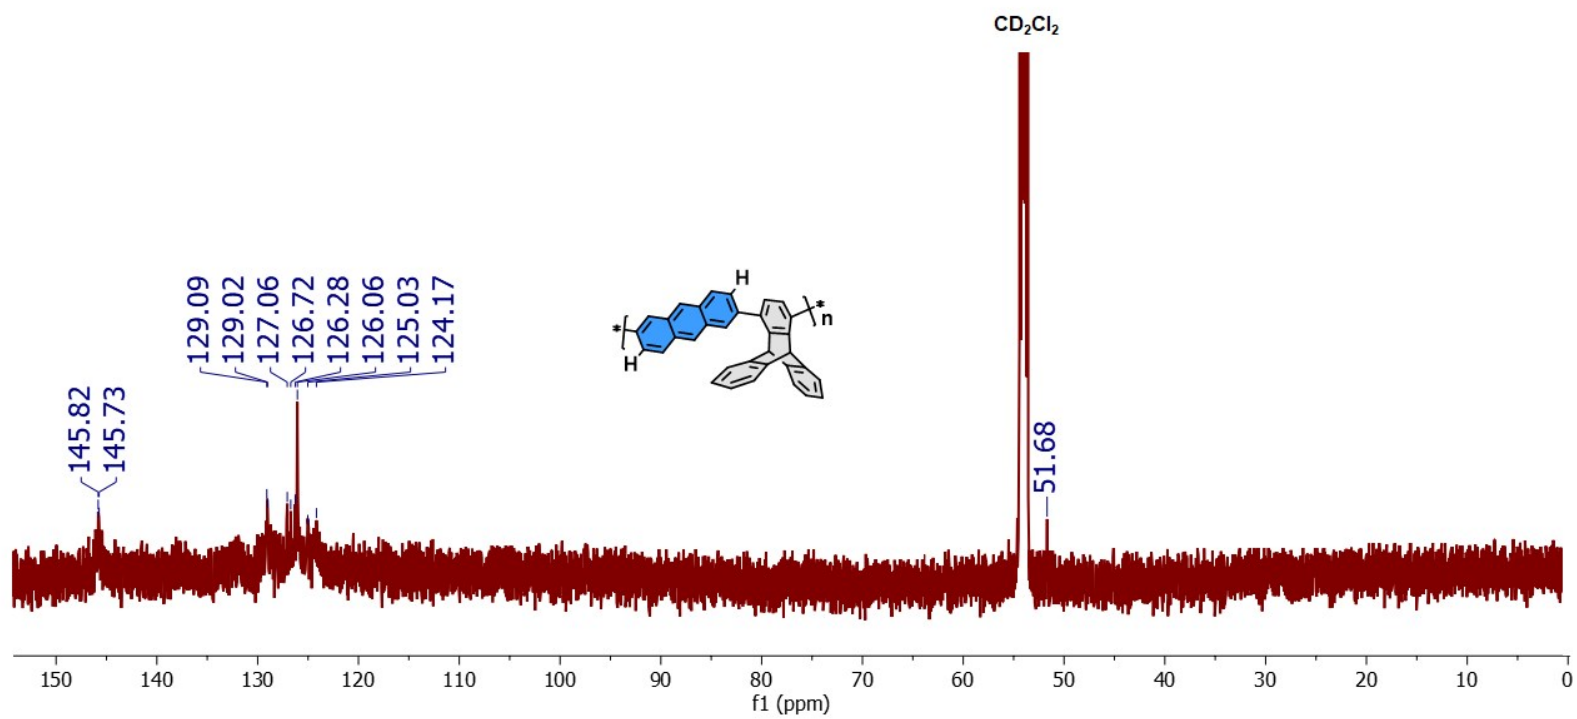

**Figure S10:**  $^{13}\text{C}$  NMR spectrum of **CBP1** ( $\text{CD}_2\text{Cl}_2$ , 150 MHz)

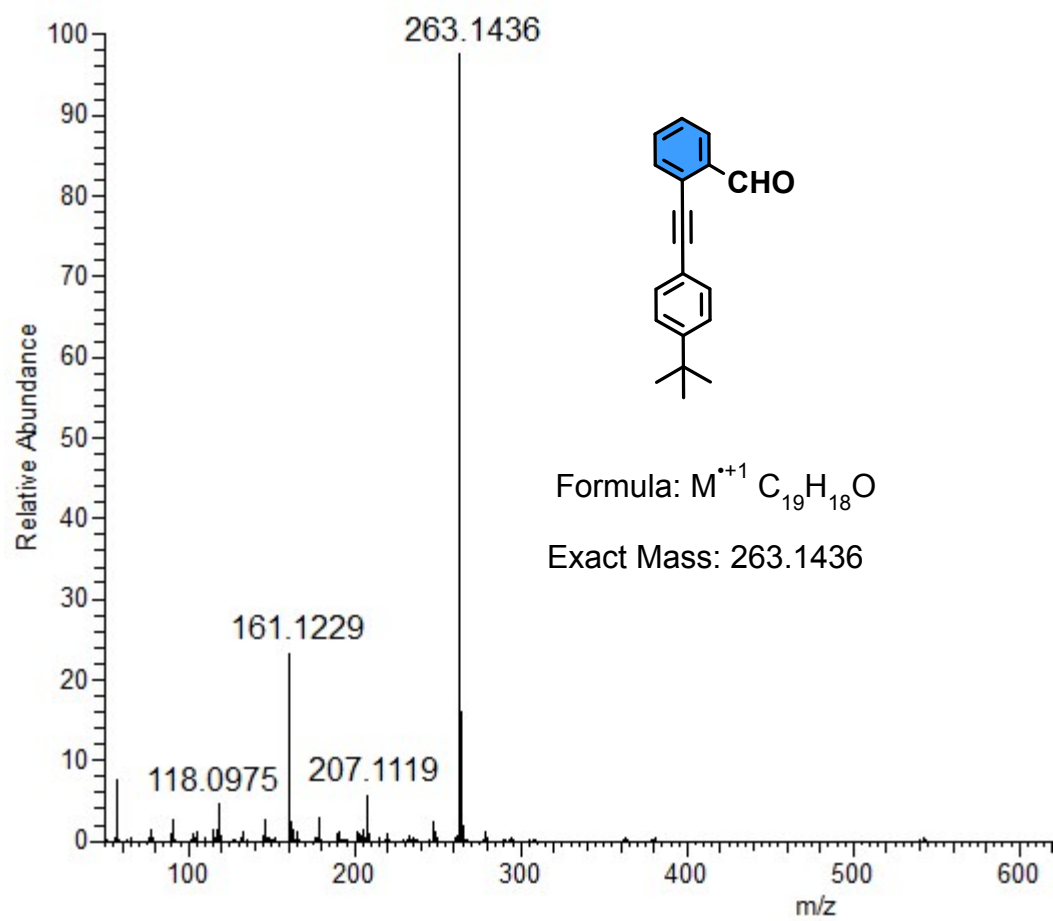

**Figure S11:** EI-HRMS of **1**

HRMS

T: + c EI Full ms [49.50-1200.50]

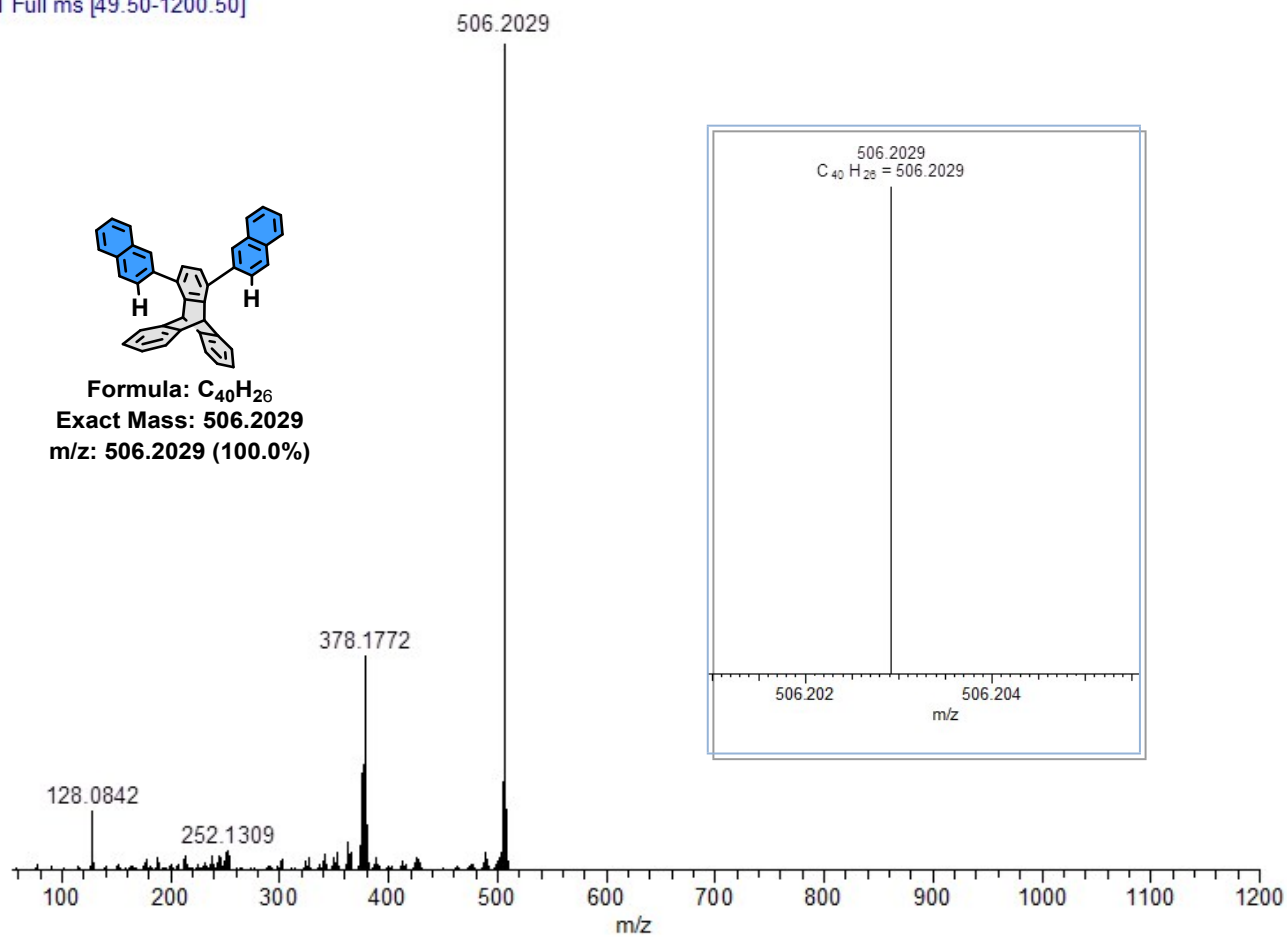

Figure S12: EI-HRMS of CBM1

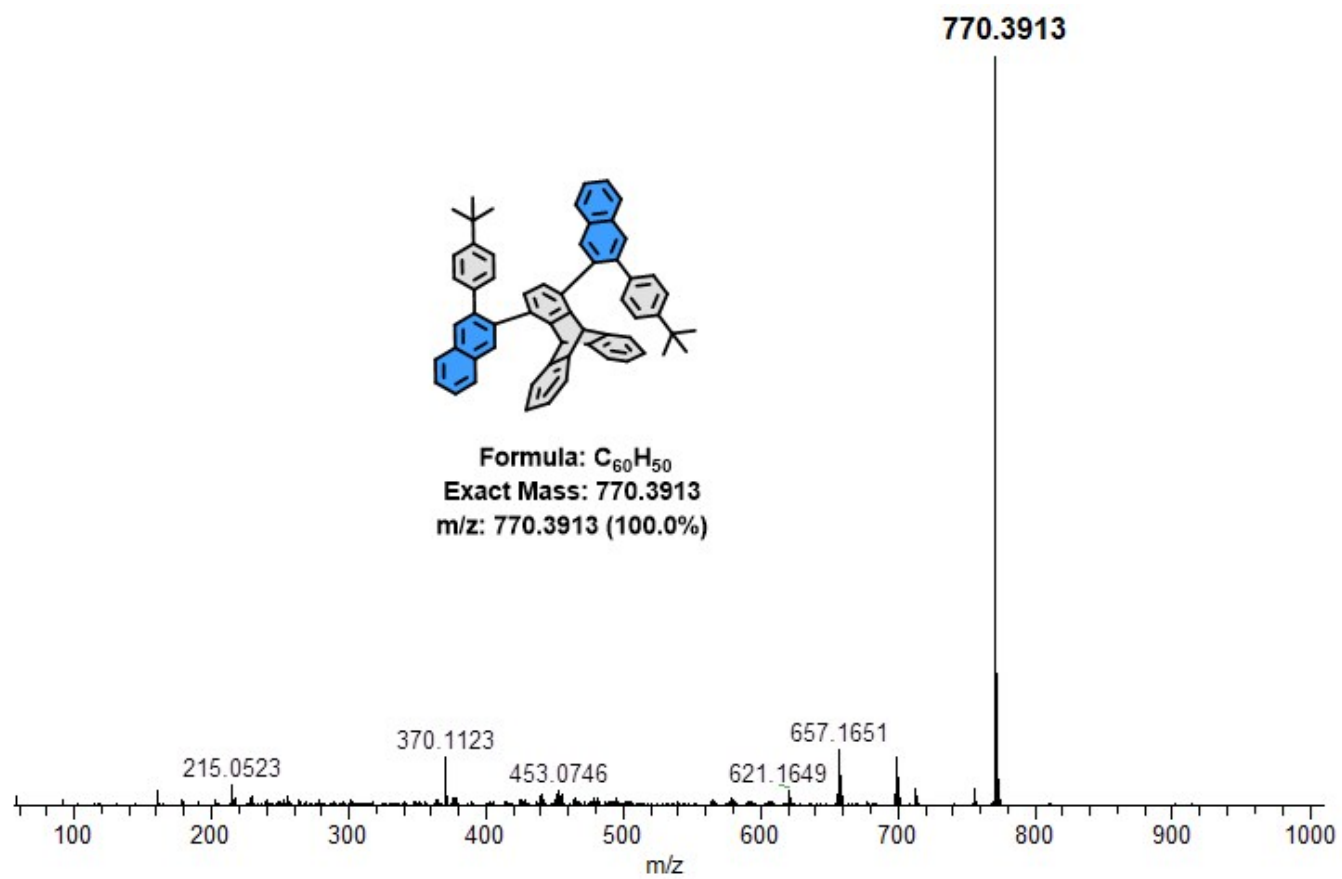

**Figure S13: EI-HRMS of CBM2**

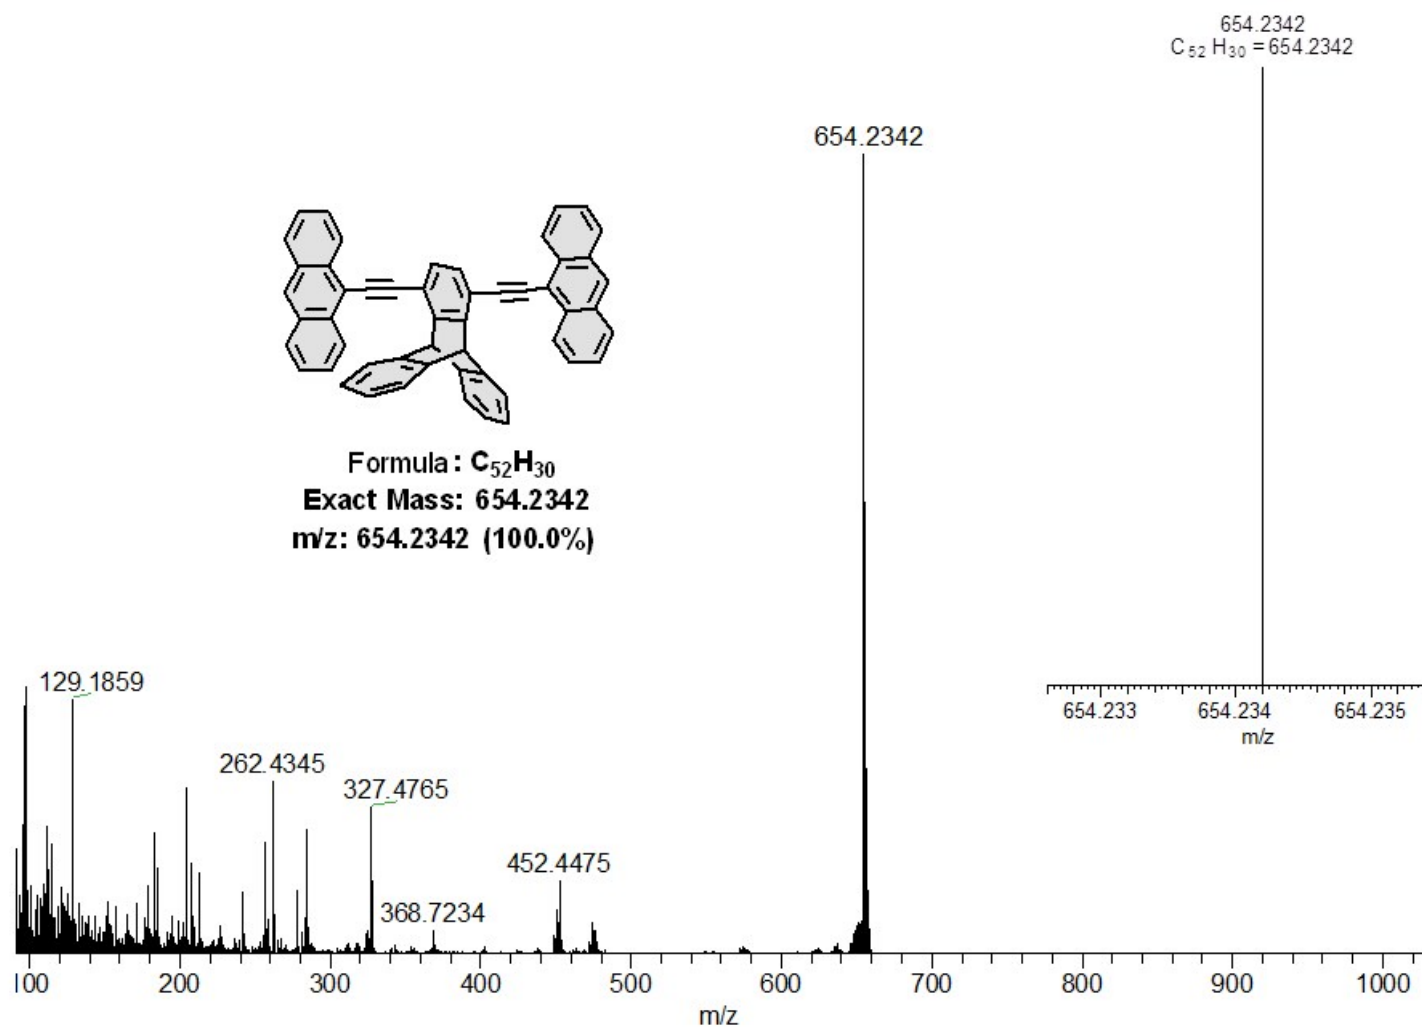

**Figure S14:** EI-HRMS of **2d**

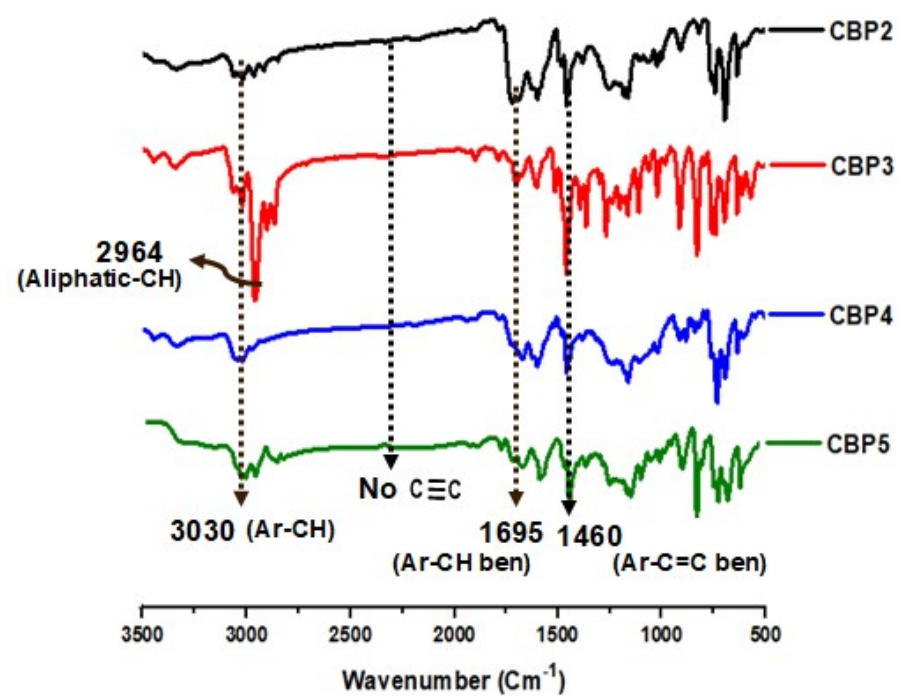

**Figure S15:** Comparative FT-IR spectra of **CBP2-5**



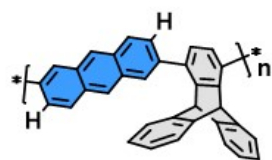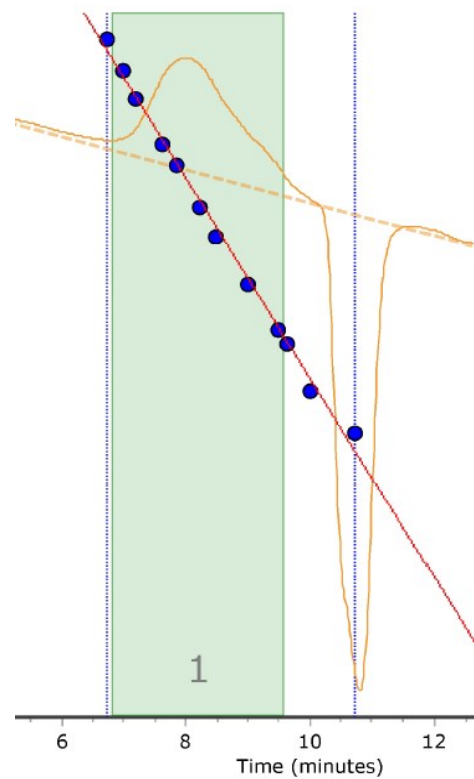

$M_n = 7400$

$M_w = 28000$

**Figure S16: GPC of CBP1**

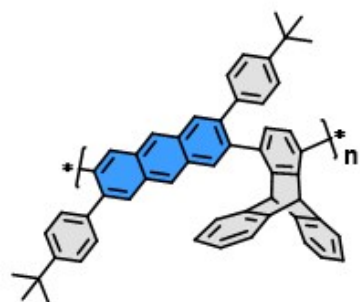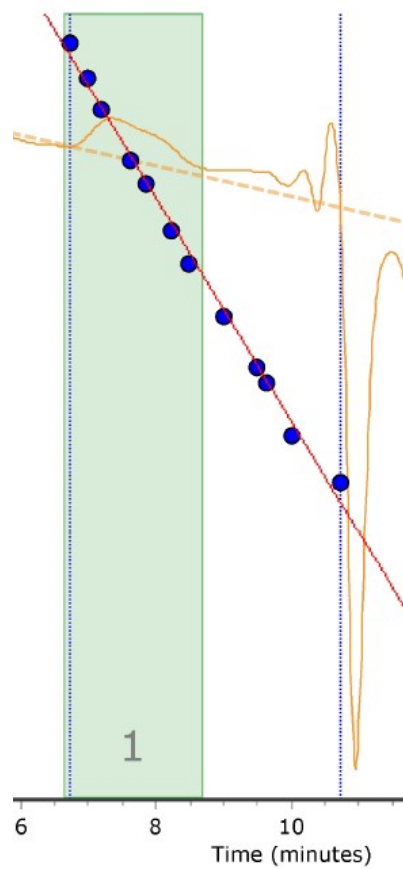

$M_n = 30187$

$M_w = 60288$

$\bar{D} = 2.0$

**Figure S17: GPC of CBP3**

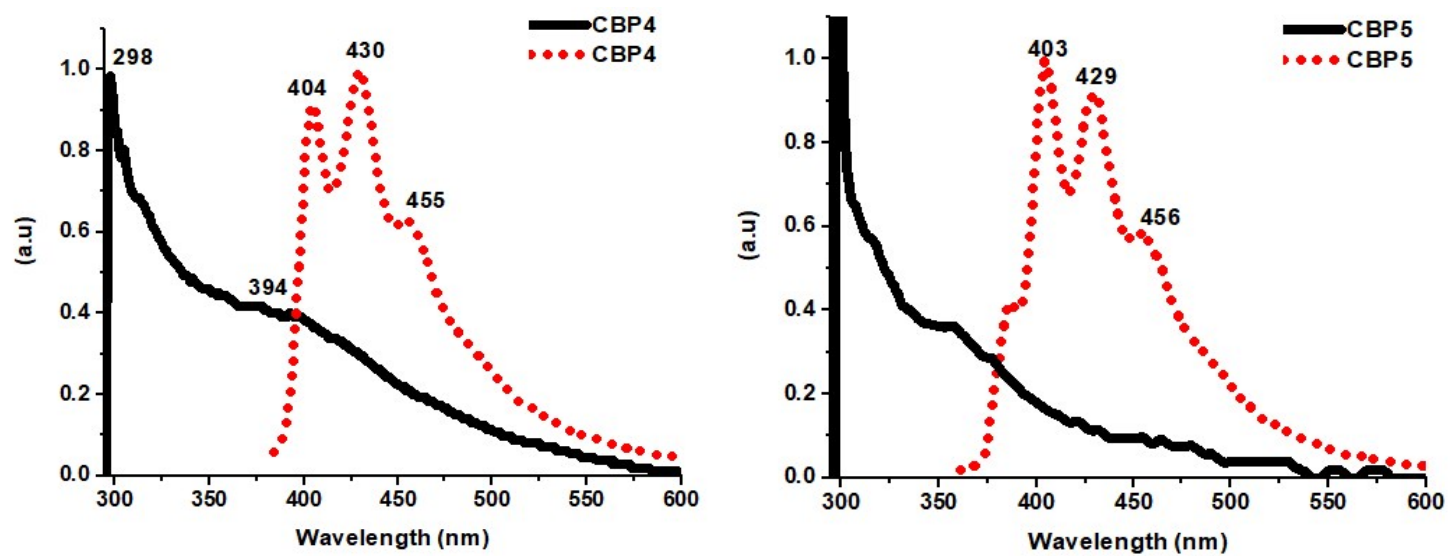

**Figure S18:** Normalized UV-VIS absorption (solid lines) and emission (dotted lines) spectra of **CBP4-5** ( $C_M = 10^{-8}$  M in THF).

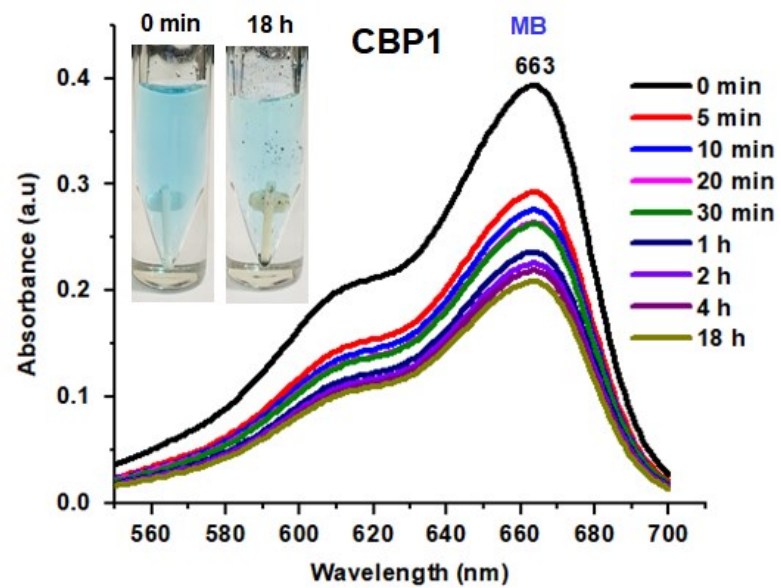

**Figure S19:** Methylene blue (MB) adsorption by **CBP1** at various time intervals

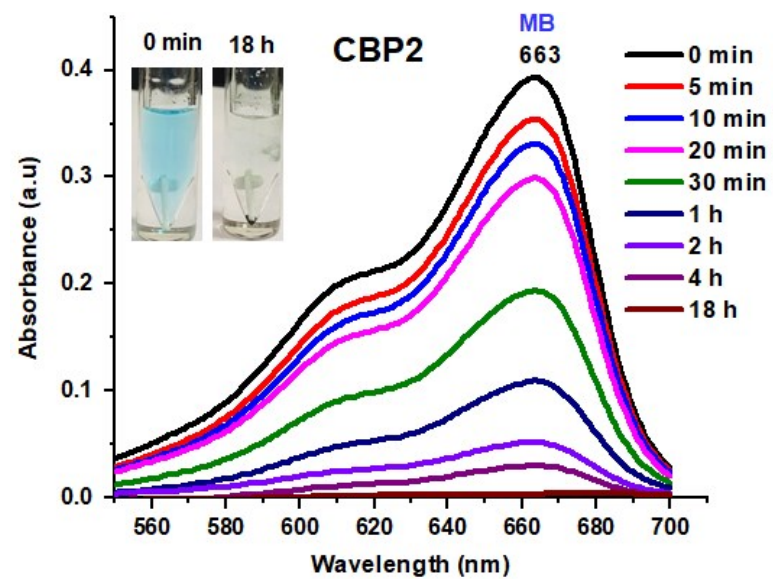

**Figure S20:** Methylene blue (MB) adsorption by **CBP2** at various time intervals

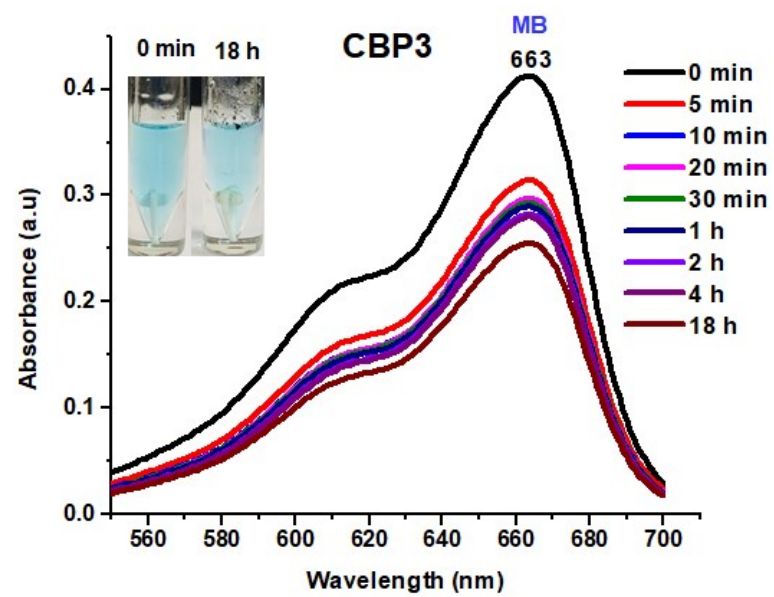

**Figure S21:** Methylene blue (MB) adsorption by **CBP3** at various time intervals

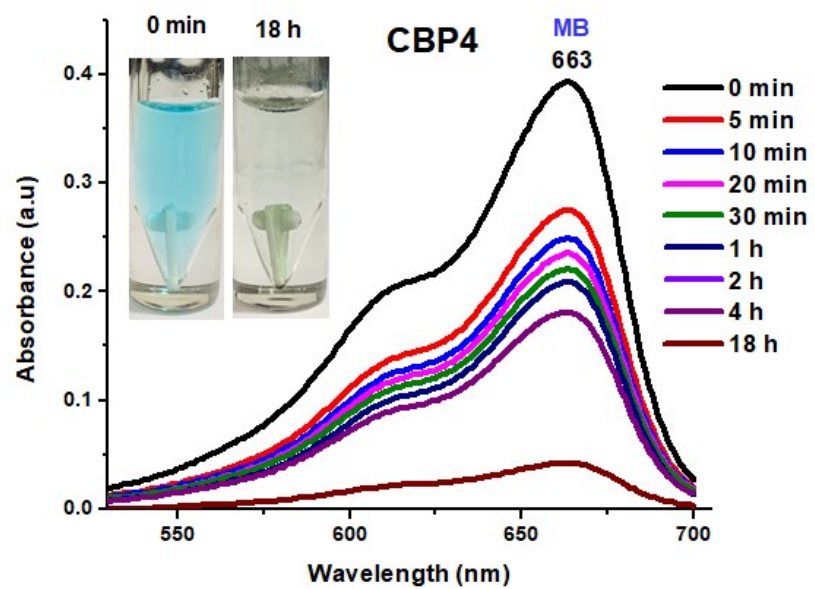

**Figure S22:** Methylene blue (MB) adsorption by **CBP4** at various time intervals
